# Supplementary material for: Synthesis and trimethylamine sensing properties of spherical V2O5 hierarchical structures
Source: Royal Society of Chemistry journal article supplement (doi:10.1039/c8nj02506a), 2018-01-01
Supplement: c8nj02506a1.pdf [file c8nj02506a1.pdf]

Supplementary information

**Synthesis and trimethylamine sensing properties of spherical  
 $V_2O_5$  hierarchical structures**

*Dongxue Wang, Kuikun Gu, Qi Zhao, Chengbo Zhai, Tianye Yang, Qing Lu, Jing Zhang\* and Mingzhe Zhang\**

State Key Laboratory of Superhard Materials, Jilin University, Changchun 130012, People's Republic of China.

E-mail address: [zhangmz@jlu.edu.cn](mailto:zhangmz@jlu.edu.cn), [zhangjing628@jlu.edu.cn](mailto:zhangjing628@jlu.edu.cn)

## XRD pattern of the precursor, and the as-obtained samples annealing of 350°C and 400°C.

The precursor is VOOH phase<sup>1, 2</sup> and the sample annealing of 400°C has better crystallinity than the sample annealing of 350°C.

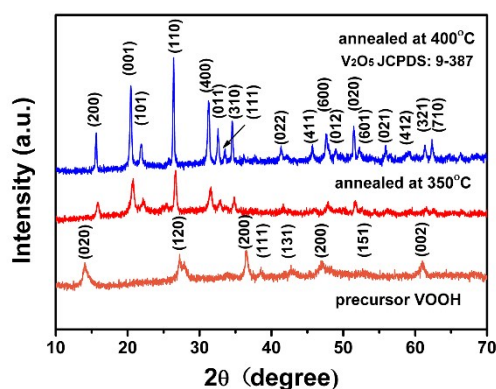

**Fig. S1.** XRD pattern of the precursor, and the as-obtained samples annealing of 350°C and 400°C.

1. W. C. Z., X. Y., L. L. Y., H. S. Q. and O. C. Z., *Advanced Materials*, 2006, **18**, 1727-1732.
2. Y. Bai, P. Jin, S. Ji, H. Luo and Y. Gao, *Ceramics International*, 2013, **39**, 7803-7808.

## Determination of specific surface area

Nitrogen adsorption and desorption isotherms and corresponding BJH (Barrett–Joyner–Halenda) pore-size distribution of the spherical V<sub>2</sub>O<sub>5</sub> are shown in **Fig. S2**. The BET surface area of the product was calculated to be 7.78 m<sup>2</sup>/g using the BET (Brunauer–Emmett–Teller) method, according to IUPAC classification, spherical V<sub>2</sub>O<sub>5</sub> shows a type III isotherm. The inset of **Fig. S2** indicates that the pore size of obtained product is 2-30 nm.

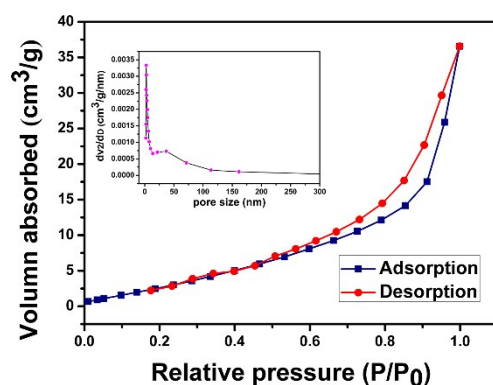

**Fig. S2.** N<sub>2</sub> adsorption–desorption isotherm of the spherical V<sub>2</sub>O<sub>5</sub> sample. The inset shows the corresponding pore size distribution obtained from the adsorption curve.

### Supplementary dynamic resistance cures

In the **Fig. S3**, the resistance of spherical V<sub>2</sub>O<sub>5</sub> sensor can nearly restore its initial value at 240°C, and the response values are very close in the range of 180°C to 280°C and reach a maximum at 180°C. However, the sensor based on spherical V<sub>2</sub>O<sub>5</sub> samples slowly recover its resistance at temperature 180°C.

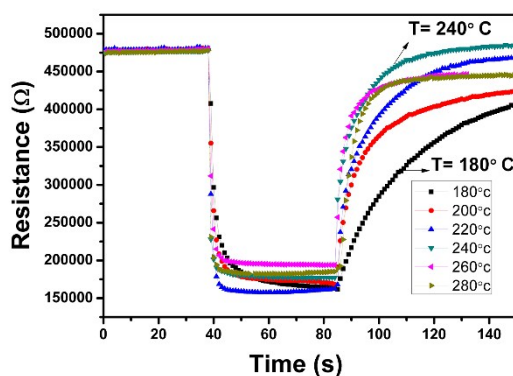

**Fig. S3.** The response cures of the sensor based on V<sub>2</sub>O<sub>5</sub> to 100 ppm TMA at 180°C, 200°C, 220°C, 240°C, 260°C and 280°C respectively.

**The morphologies and gas sensitivity of the sample annealing of 350°C, 400°C and 450°C**

In the **Fig. S4**, the sample annealing of 350°C and 400°C have similar morphology, but the morphology of the sample annealing of 450°C has been changed. And the sensor based on the sample annealing of 400°C shows the higher response ( $S=2.8$ ) than the sample annealing of 350°C ( $S=2.35$ ) and 450°C ( $S=2.13$ ) to 100 ppm TMA.

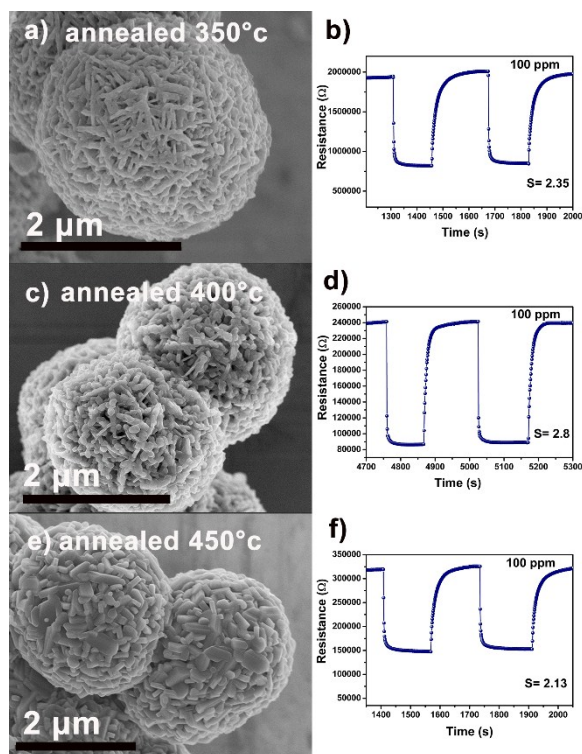

**Fig. S4.** ( a), c) and e)) the morphologies of the sample annealing of 350°C, 400°C and 450°C; ( b), d) f)) the response curve of the sample annealing of 350°C, 400°C and 450°C respectively.
